# Supplementary material for: Hyperandrogenism and insulin resistance contribute to hepatic steatosis and inflammation in female rat liver
Source: PubMed Central journal article supplement (PMC5915065; doi:10.18632/oncotarget.24477), 2018-02-09
Supplement: oncotarget-09-18180-s001.pdf [file oncotarget-09-18180-s001.pdf]

## Hyperandrogenism and insulin resistance contribute to hepatic steatosis and inflammation in female rat liver

### SUPPLEMENTARY MATERIALS

**Supplementary Table 1: Antibodies: species, clone/catalog number, method, dilution, and source**

| Antibody              | Species | Cat. No. | kDa   | Method | Dilution | Source                                         |
|-----------------------|---------|----------|-------|--------|----------|------------------------------------------------|
| IR $\alpha$           | Rabbit  | 07-724   | 97    | WB     | 1:500    | Milipore (Darmstadt, Germany)                  |
| IR $\beta$            | Rabbit  | 3025     | 95    | WB     | 1:1000   | Cell Signaling Technology (Danver, MA)         |
| IRS1                  | Rabbit  | 3407     | 180   | WB     | 1:500    | Cell Signaling Technology                      |
| p-IRS1 (S1101)        | Rabbit  | 2385     | 180   | WB     | 1:300    | Cell Signaling Technology                      |
| IRS2                  | Rabbit  | 4502     | 185   | WB     | 1:200    | Cell Signaling Technology                      |
| pan-Akt               | Mouse   | 2920     | 60    | WB     | 1:1000   | Cell Signaling Technology                      |
| p-Akt (S473)          | Rabbit  | 4060     | 60    | WB     | 1:500    | Cell Signaling Technology                      |
| p-Akt (T308)          | Rabbit  | 13038    | 60    | WB     | 1:500    | Cell Signaling Technology                      |
| AS160                 | Rabbit  | 2670     | 160   | WB     | 1:500    | Cell Signaling Technology                      |
| GSK3 $\alpha$         | Rabbit  | 4337     | 51    | WB     | 1:2000   | Cell Signaling Technology                      |
| p-GSK3 $\alpha$ (S21) | Rabbit  | 9316     | 51    | WB     | 1:500    | Cell Signaling Technology                      |
| GSK3 $\beta$          | Rabbit  | 12456    | 46    | WB     | 1:2000   | Cell Signaling Technology                      |
| p-GSK3 $\beta$ (S9)   | Rabbit  | 5558     | 46    | WB     | 1:500    | Cell Signaling Technology                      |
| Beclin-1              | Rabbit  | 3495     | 60    | WB     | 1:1000   | Cell Signaling Technology                      |
| Atg7                  | Rabbit  | 8558     | 78    | WB     | 1:1000   | Cell Signaling Technology                      |
| Atg3                  | Rabbit  | 3415     | 40    | WB     | 1:1000   | Cell Signaling Technology                      |
| Atg5                  | Rabbit  | 12994    | 55    | WB     | 1:1000   | Cell Signaling Technology                      |
| Atg12                 | Rabbit  | 4180     | 16,53 | WB     | 1:1000   | Cell Signaling Technology                      |
| Atg16L1               | Rabbit  | 8089     | 66,68 | WB     | 1:1000   | Cell Signaling Technology                      |
| LC3I/II               | Rabbit  | 12741    | 14,16 | WB     | 1:1000   | Cell Signaling Technology                      |
| p62                   | Rabbit  | 5114     | 62    | WB     | 1:1000   | Cell Signaling Technology                      |
| $\alpha$ -SMA         | Rabbit  | 6487     | 100   | WB     | 1:1000   | Cell Signaling Technology                      |
| AR                    | Rabbit  | sc816    | 110   | WB     | 1:100    | Santa Cruz Biotechnology                       |
| IGF1R                 | Rabbit  | 9750     | 95    | WB     | 1:1000   | Cell Signaling Technology                      |
| p-IGF1R               | Rabbit  | 3024     | 95    | WB     | 1:500    | Cell Signaling Technology                      |
| IGF2R                 | Rabbit  | 14364    | 275   | WB     | 1:500    | Cell Signaling Technology                      |
| IGFBP1                | Rabbit  | 06-580   | 32    | WB     | 1:500    | Upstate (Darmstadt, Germany)                   |
| F4/80                 | Rabbit  | ab74383  | 160   | WB     | 1:1000   | Abcam (Cambridge, UK)                          |
| MPO                   | Rabbit  | sc16128  | 72    | WB     | 1:100    | Santa Cruz Biotechnology (Heidelberg, Germany) |
| CD4                   | Goat    | sc1140   | 54    | WB     | 1:100    | Santa Cruz Biotechnology                       |
| TNF $\alpha$          | Goat    | sc1349   |       | IHC    | 1:150    | Santa Cruz Biotechnology                       |
| IL1 $\beta$           | Rabbit  | sc7884   |       | IHC    | 1:100    | Santa Cruz Biotechnology                       |

IR, insulin receptor; IRS, insulin receptor substrate; AS160, the Akt Ser/Thr kinase 160; GSK3, glycogen synthase kinase 3; Atg, autophagy-related protein; LC3, microtubule-associated protein 1A/1B-light chain 3 (a cytosolic LC3-I is conjugated to phosphatidylethanolamine to form LC3-II, which is recruited to autophagosomal membranes); p62, sequestosome 1 (SQSTM1);  $\alpha$ -SMA,  $\alpha$ -smooth muscle actin; AR, androgen receptor; IGF1R, insulin-like growth factor receptor 1; IGFBP1, IGF binding protein 1; F4/80, adhesion G protein-coupled receptor E1; MPO, the heme protein myeloperoxidase; CD4, cluster of differentiation 4; TNF $\alpha$ , tumor necrosis factor  $\alpha$ ; IL1 $\beta$ , interleukin-1 $\beta$ ; WB, western blot; IHC, immunohistochemistry.

**Supplementary Table 2: Sequences of primer pairs used for qRT-PCR measurement.** See Supplementary\_Table\_2

**Supplementary Table 3: The intra-assay and inter-assay % CV for the rat insulin, steroid hormones and lipid profile**

|         | <b>Intra-assay % CV</b> | <b>Inter-assay % CV</b> |
|---------|-------------------------|-------------------------|
| Insulin | 6.4                     | 7.5                     |
| E2      | 6.2                     | 7.4                     |
| Total T | 5.9                     | 6.6                     |
| DHT     | 4.2                     | 7.5                     |
| A4      | 6.0                     | 7.4                     |
| RBP4    | 6.0                     | 6.5                     |
| TC      | 2.1                     | 4.0                     |
| TG      | 2.0                     | 3.5                     |
| HDL-C   | 2.6                     | 4.2                     |
| ALT     | 7.0                     | 8.3                     |
| AST     | 7.2                     | 8.1                     |
| PIIINP  | 6.2                     | 7.3                     |
| HA      | 6.0                     | 7.1                     |

E2, 17 $\beta$ -estradiol; T, testosterone; DHT, dihydrotestosterone; A4, androstenedione; RBP4, retinol-binding protein 4; TC, total cholesterol; TG, triglyceride; HDL-C, high-density lipoprotein cholesterol; ALT, alanine aminotransferase; AST, aspartate aminotransferase; PIIINP, N-terminal propeptide of type III collagen; HA, hyaluronic acid.

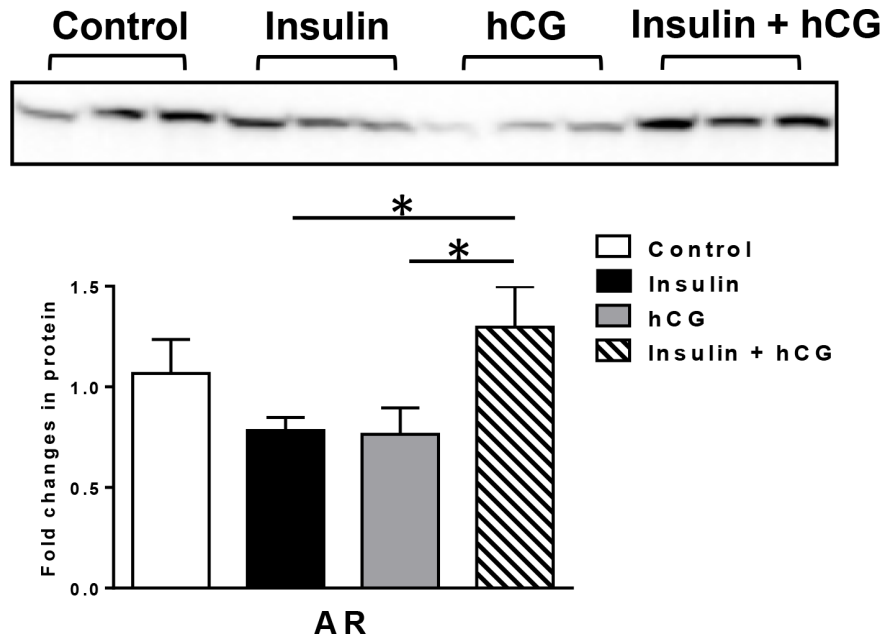

**Supplementary Figure 1: Effects of insulin and/or hCG on the androgen receptor (AR) expression in the rat liver.** Representative AR with immunoblotting quantification ( $n = 9/\text{group}$ ) is shown, total proteins served as the loading control. Values are expressed as means  $\pm$  SEM. \* $p < 0.05$ .

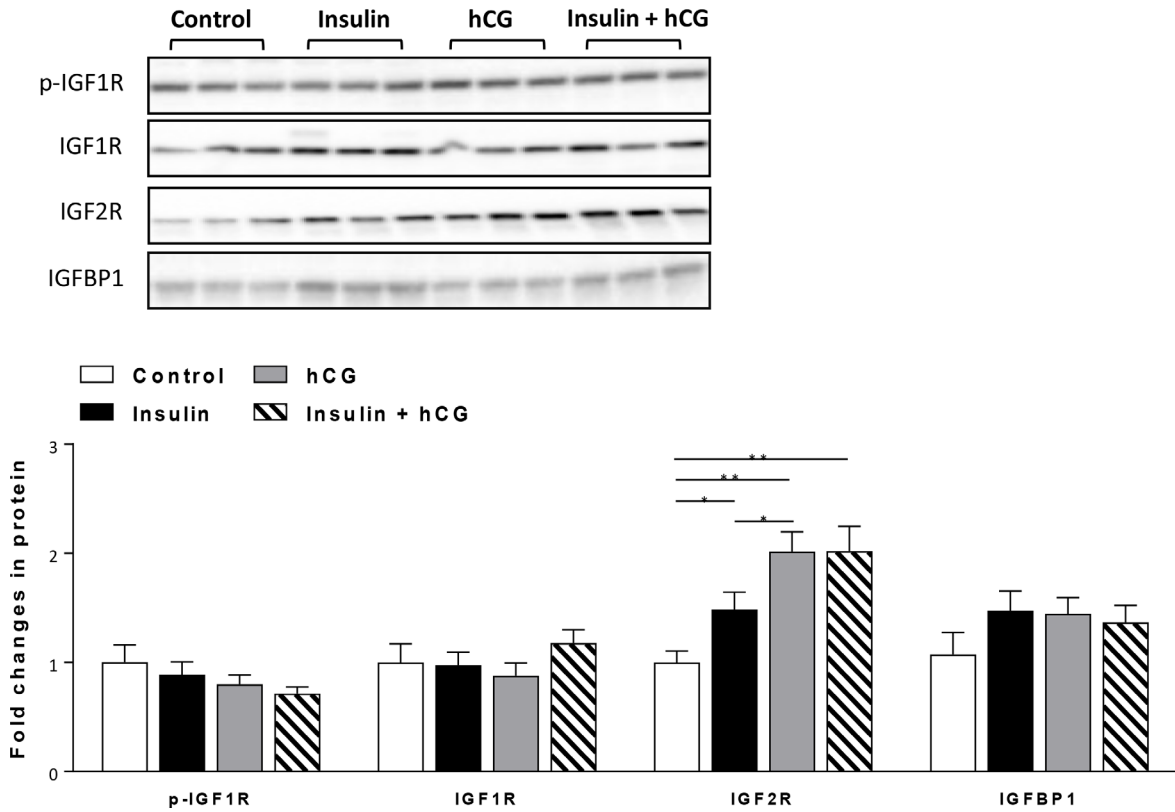

**Supplementary Figure 2: Effects of insulin and/or hCG on insulin-like growth factor 1/2 receptor (IGF-1R and IGF2R) and IGF binding protein 1 (IGFBP1) expression in the rat liver.** Representative p-IGF1R, IGF1R, IGF2R, and IGFBP1 are shown. For immunoblotting quantification ( $n = 9/\text{group}$ ), total proteins served as the loading control. Values are expressed as means  $\pm$  SEM. \* $p < 0.05$ ; \*\* $p < 0.01$ .

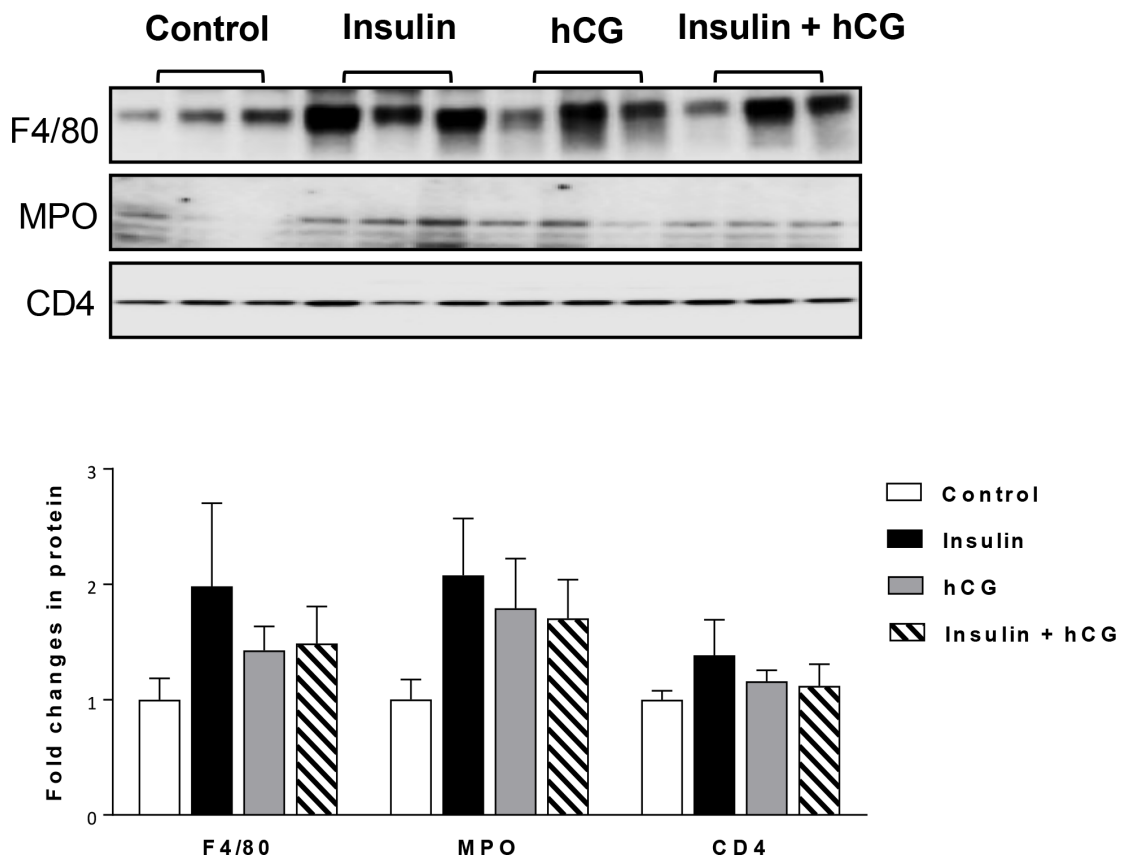

**Supplementary Figure 3: Effects of insulin and/or hCG on F4/80, MPO, and CD4 expression in the rat liver.** Representative F4/80, MPO, and CD4 are shown. For immunoblotting quantification ( $n = 9/\text{group}$ ), total proteins served as the loading control. Values are expressed as means  $\pm$  SEM.

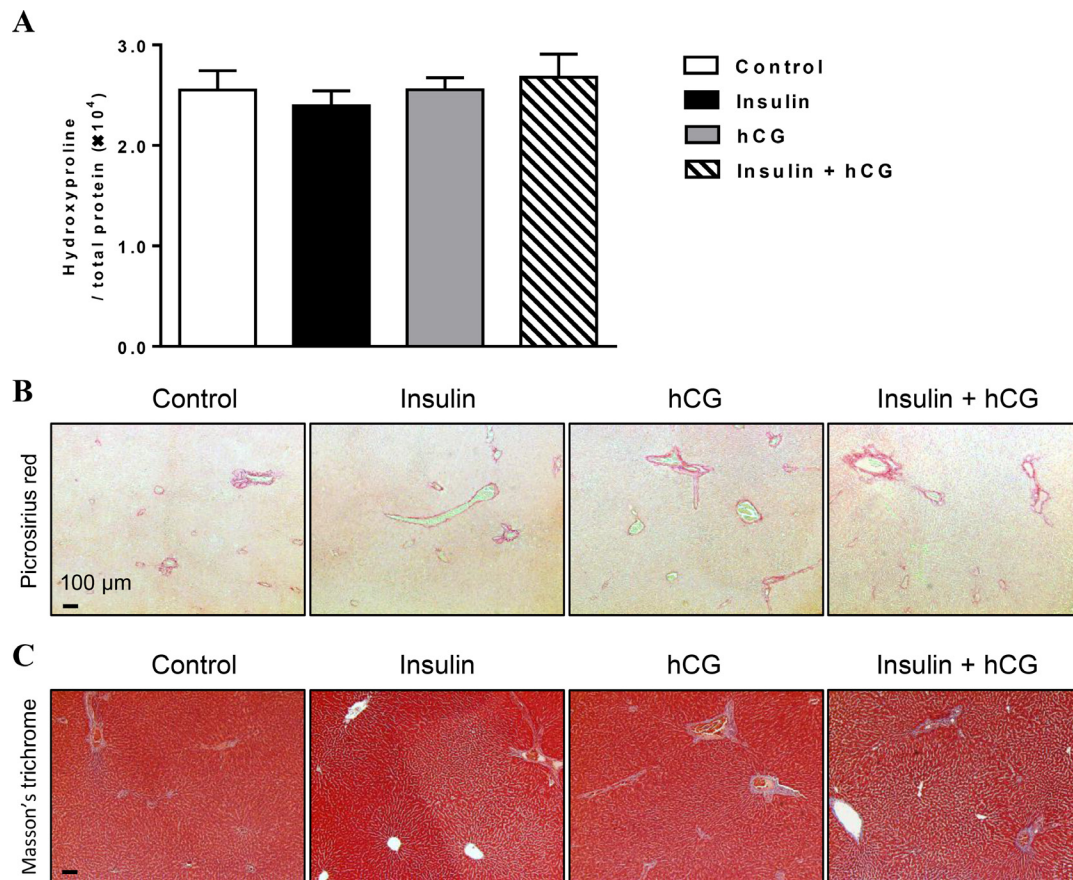

**Supplementary Figure 4: Effects of insulin and/or hCG on collagen deposition in the rat liver.** Picrosirius red (A) and Masson's trichrome (B) staining of liver tissue sections ( $n = 9-12/\text{group}$ ) did not reveal any major histological differences in collagen deposition between groups regardless of different treatment. There was no significant difference in hepatic hydroxyproline levels (C) in any of the groups ( $n = 9/\text{group}$ ). Scale bars are indicated in the photomicrographs.
